# Supplementary material for: Community diversity is associated with intra-species genetic diversity and gene loss in the human gut microbiome
Source: eLife journal article supplement (doi:10.7554/elife.78530), 2023-02-09
Supplement: supp [file elife_poa_e78530_Figure_2_figure_supplement_1.pdf › elife_poa_e78530_Figure_2_figure_supplement_1.pdf]

**A1**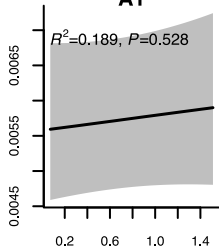

Shannon diversity (phylum)

**B1**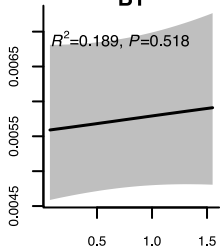

Shannon diversity (class)

**C1**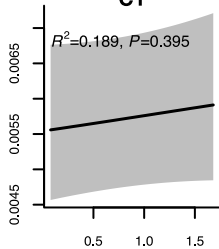

Shannon diversity (order)

**D1**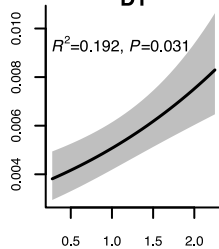

Shannon diversity (family)

**E1**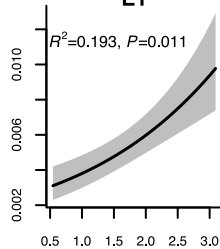

Shannon diversity (genus)

**A2**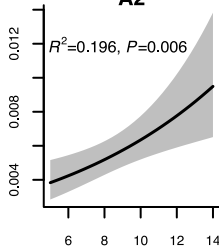

Richness (phylum)

**B2**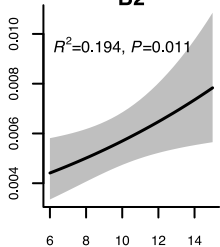

Richness (Class)

**C2**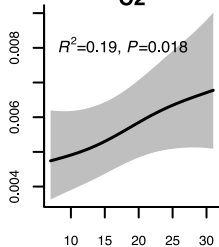

Richness (order)

**D2**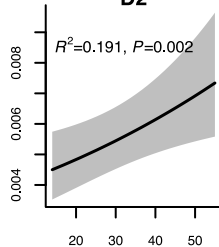

Richness (family)

**E2**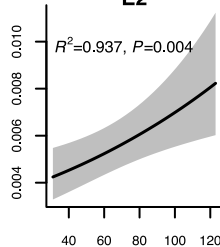

Richness (genus)
