# Supplementary figures and images for: Community diversity is associated with intra-species genetic diversity and gene loss in the human gut microbiome
Source: eLife journal article supplement (doi:10.7554/elife.78530), 2023-02-09

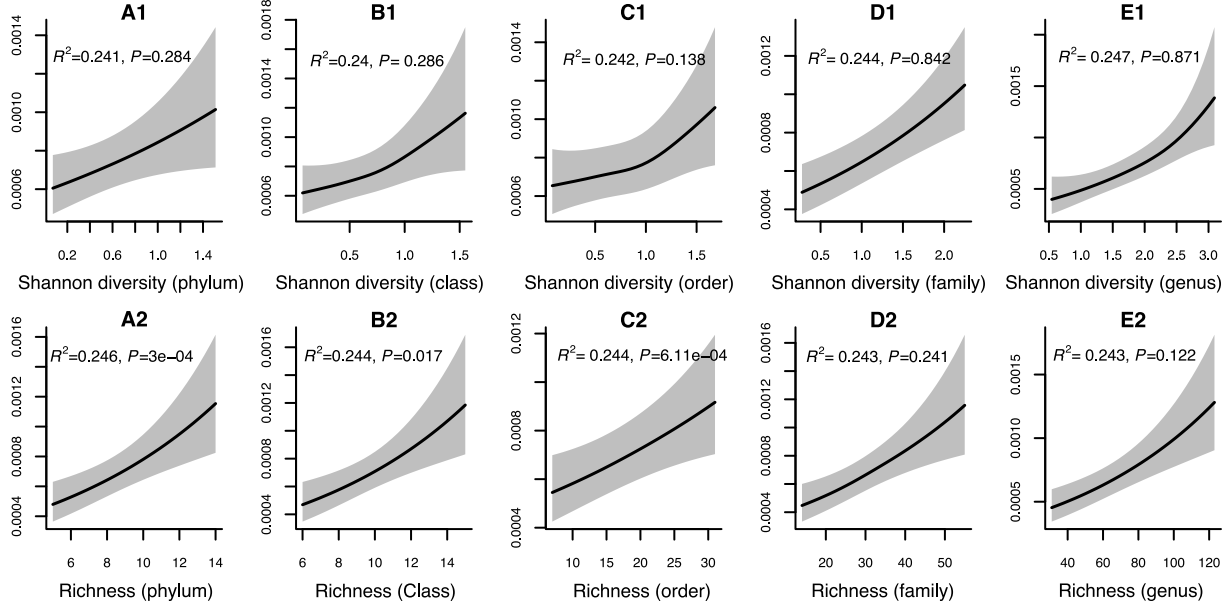

Supplement: supp [file elife_poa_e78530_Figure_2_figure_supplement_2.pdf › elife_poa_e78530_Figure_2_figure_supplement_2.pdf]

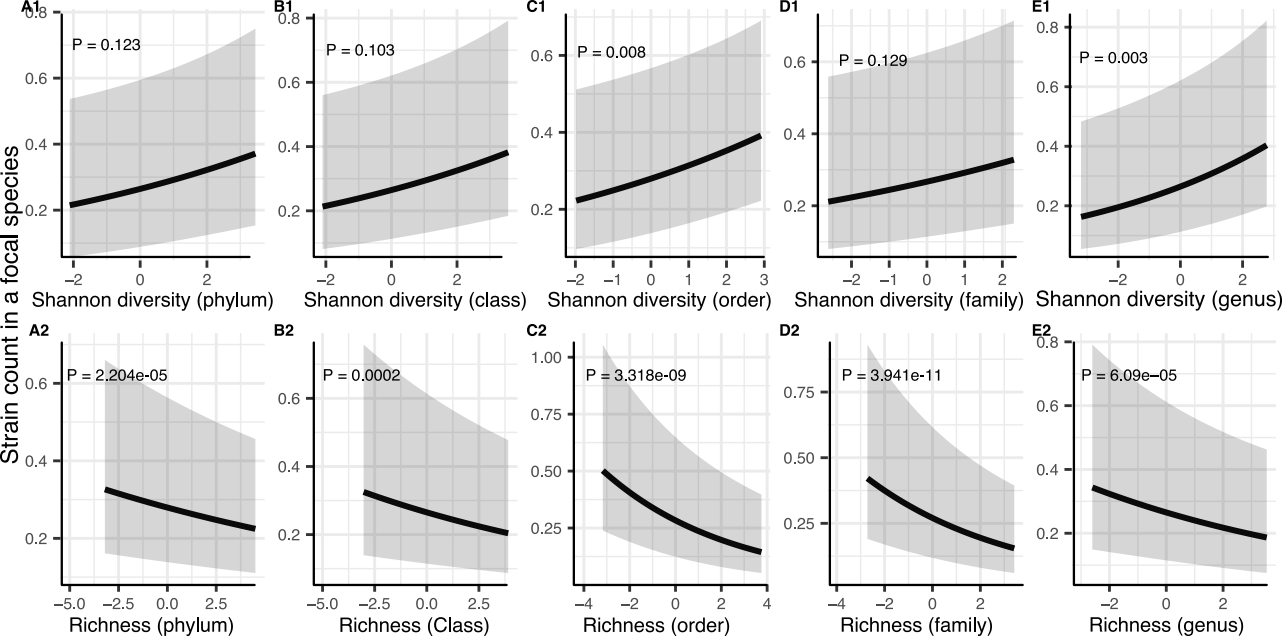

Supplement: supp [file elife_poa_e78530_Figure_3_figure_supplement_1.pdf › elife_poa_e78530_Figure_3_figure_supplement_1.pdf]

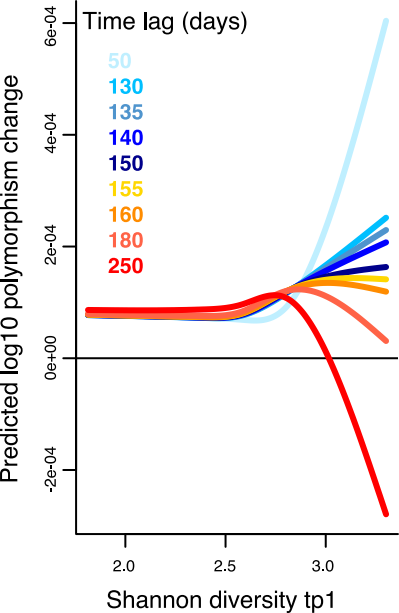

Supplement: supp [file elife_poa_e78530_Figure_5_figure_supplement_1.pdf › elife_poa_e78530_Figure_5_figure_supplement_1.pdf]
